# Supplementary material
Source: PubMed Central journal article supplement (PMC4773621)
Supplement: jcsm.12.3.401s1.pdf [file jcsm.12.3.401s1.pdf]

**Table S1.** Resource use differences for those with a narcolepsy diagnosis and matched controls

|                                              | 2:1 Propensity match |                    |                       |                    |                    |                    | p value <sup>a</sup> |
|----------------------------------------------|----------------------|--------------------|-----------------------|--------------------|--------------------|--------------------|----------------------|
|                                              | Controls<br>n = 874  |                    | Narcolepsy<br>n = 437 |                    | Total<br>n = 1,311 |                    |                      |
|                                              | Mean                 | Standard deviation | Mean                  | Standard deviation | Mean               | Standard deviation |                      |
| Number of hospitalizations (last 6 mo)       | 0.37                 | 2.31               | 1.02                  | 4.51               | 0.58               | 3.23               | < 0.001              |
| Number of ED visits (last 6 mo)              | 0.50                 | 2.26               | 1.22                  | 5.27               | 0.74               | 3.57               | 0.001                |
| Number of Traditional HCP visits (last 6 mo) | 5.40                 | 7.98               | 10.25                 | 12.44              | 7.02               | 9.95               | < 0.001              |
| Number of neurologist visits (last 6 mo)     | 0.12                 | 0.58               | 0.52                  | 1.26               | 0.25               | 0.89               | < 0.001              |
| Number of pulmonologist visits (last 6 mo)   | 0.11                 | 0.57               | 0.16                  | 0.67               | 0.12               | 0.60               | 0.106                |
| Number of psychiatrist visits (last 6 mo)    | 0.29                 | 1.78               | 0.72                  | 2.50               | 0.42               | 2.06               | < 0.001              |

<sup>a</sup> p values represent omnibus comparisons between those with and without narcolepsy.

ED = emergency department; HCP = health care professional.
